# Supplementary material for: Consensus Analysis for the Panel Responses and the Psychometrics Properties in Script Concordance Testing
Source: Research Square preprint supplement (doi:10.21203/rs.3.rs-133349/v1), 2021-01-07
Supplement: Supplementary file 1 [file 175fff8cc0ae7413a513e939.docx]

| **ITEMS** | **-2** | **-1** | **0** | **+1** | **+2** |
| --- | --- | --- | --- | --- | --- |
| Item no. 45 | 0 | 0 | 0 | 0.33 | 1 |
| Item no. 46 | 0 | 0.21 | 0.07 | 1 | 0.14 |
| Item no. 47 | 1 | 0.18 | 0 | 0 | 0 |
| Item no. 48 | 1 | 0.3 | 0.1 | 0.3 | 0.3 |
