# Supplementary material for: Consensus Analysis for the Panel Responses and the Psychometrics Properties in Script Concordance Testing
Source: Research Square preprint supplement (doi:10.21203/rs.3.rs-133349/v1), 2021-01-07
Supplement: Supplementary file 1 [file a1d3a0af7aab2793d8ad34da.doc]

## TITLE PAGE

**Title:**

Consensus Analysis for the panel responses and the psychometrics properties in Script Concordance Testing

Sivaraman Ganesan1, Shital Bhandary2, Mahalakshmy T3, Thomas Chacko4, Zayapragassa Rajan5, Surya Ravichandran1, Kalaiarasi R1, Karthikeyan R1, Arun Alexander1, Sunil Kumar Saxena1

**Affiliations:**

1. Department of ENT, Jawaharlal Institute of Postgraduate Medical Education and Research, Puducherry, India
2. Department of Public Health & Medical Education, Patan Academy of Health Sciences, Lalitpur, Nepal
3. Department of Preventive and Social Medicine, Jawaharlal Institute of Postgraduate Medical Education and Research, Puducherry, India
4. Dean Medical Education & Professor Community Medicine, Believers Church Medical College Hospital, Thiruvalla, Kerala
5. Department of Medical Education, Jawaharlal Institute of Postgraduate Medical Education and Research, Puducherry, India

**Corresponding Author:**

Mahalakshmy Thulasingam, MBBS, MD, DNB

Associate Professor

*Address:* Department of Preventive and Social Medicine, Jawaharlal Institute of Postgraduate Medical Education and Research, Puducherry, India

*Email:* [mahalakshmi.dr@gmail.com](mailto:mahalakshmi.dr@gmail.com)

*Telephone:* 9488729774

**Statement conflict of interest:**

There is no conflict of interest in this article.

1. A 16 year old female presents to ENT OPD with fever for two days and on examination you find a membrane over tonsil

| If you were thinking of | And then you find | This diagnosis becomes: |
| --- | --- | --- |
| 1.Diphtheria | Greyish white membrane difficult to remove | -2 -1 0 +1 +2 |
| 2.Vincent angina | Curdy white patch | -2 -1 0 +1 +2 |
| 3.Membranous tonsillitis. | An exudative membrane easy to remove | -2 -1 0 +1 +2 |

Judgement type: Diagnosis

-2 ‘‘Ruled out or almost ruled out’’

-1 ‘‘Less likely’’

0 ‘‘neither more nor less likely’’

1 ‘‘More likely’’

2 ‘‘certain or almost certain

1. A 6-year-old previously healthy boy presents with acute onset of fever of 39°C (102°F), severe throat pain that is exacerbated by swallowing, headache, and malaise.

| If you were thinking of | And then you find | This diagnosis becomes: |
| --- | --- | --- |
| 4.Acute epiglottitis | His tonsils are symmetrically enlarged and red, with purulent exudate. | -2 -1 0 +1 +2 |
| 5.Acute Laryngotracheobronchitis | No respiratory difficulity | -2 -1 0 +1 +2 |
| 6.Peritonsillar abscess | Marked Odynophagia with muffled and thick speech | -2 -1 0 +1 +2 |
| 7.Acute retropharyngitis | Neck stiffness | -2 -1 0 +1 +2 |

Judgement type: Diagnosis

-2 ‘‘Ruled out or almost ruled out’’

-1 ‘‘Less likely’’

0 ‘‘neither more nor less likely’’

1 ‘‘More likely’’

2 ‘‘certain or almost certain

1. A 3-year-old girl child presents with acute onset of high grade fever with minimal respiratory distress

| If you were thinking of | And then you find | This diagnosis becomes: |
| --- | --- | --- |
| 8.Acute epiglottitis | Child being Toxic with drooling of saliva | -2 -1 0 +1 +2 |
| 9.Adenoiditis | Voice change | -2 -1 0 +1 +2 |
| 10.Acute tonsillitis | Difficulty in swallowing | -2 -1 0 +1 +2 |
| 11.Diphtheria | Hoarse voice, croupy cough | -2 -1 0 +1 +2 |

Judgement type: Diagnosis

-2 ‘‘Ruled out or almost ruled out’’

-1 ‘‘Less likely’’

0 ‘‘neither more nor less likely’’

1 ‘‘More likely’’

2 ‘‘certain or almost certain

1. A 3-year-old boy was presented with a history of sudden onset respiratory difficuilty.

| If you were thinking of | And then you find | This diagnosis becomes: |
| --- | --- | --- |
| 12.Acute episode of asthma | No previous episodes | -2 -1 0 +1 +2 |
| 13.Foreign body ingestion | Difficuilty swallowing | -2 -1 0 +1 +2 |
| 14.Foreign body aspiration | Playing with colourful interlocking plastic bricks | -2 -1 0 +1 +2 |
| 15.Foreign body aspiration | Past history of fever for 4-5 days | -2 -1 0 +1 +2 |

Judgement type: Diagnosis

-2 ‘‘Ruled out or almost ruled out’’

-1 ‘‘Less likely’’

0 ‘‘neither more nor less likely’’

1 ‘‘More likely’’

2 ‘‘certain or almost certain

A 57-year-old man presents with a 6-month history of hoarseness of voice

| If you were thinking of | And then you find | This diagnosis becomes: |
| --- | --- | --- |
| 16.Cancer larynx | History of chronic cough with hemoptysis | -2 -1 0 +1 +2 |
| 17.Tuberculosis of larynx | History of odynophagia | -2 -1 0 +1 +2 |
| 18.Singer’s nodule | History of smoking | -2 -1 0 +1 +2 |
| 19.Ortners syndrome | History of mitral stenosis | -2 -1 0 +1 +2 |

Judgement type: Diagnosis

-2 ‘‘Ruled out or almost ruled out’’

-1 ‘‘Less likely’’

0 ‘‘neither more nor less likely’’

1 ‘‘More likely’’

2 ‘‘certain or almost certain

1. A 45-year-old man presents with a 3-month history of painless, enlarging, left-sided neck mass

| If you were thinking of | And then you find | This diagnosis becomes: |
| --- | --- | --- |
| 20.Thyroid mass | Moving with deglutition | -2 -1 0 +1 +2 |
| 21.Tuberculosis | Granulation over the posterior glottis(cord and arytenoid) | -2 -1 0 +1 +2 |
| 22.Cancer esophagus | Left vocal cord palsy | -2 -1 0 +1 +2 |
| 23.Supraclavicular lymph node | Abdominal lump on examination | -2 -1 0 +1 +2 |

Judgement type: Diagnosis

-2 ‘‘Ruled out or almost ruled out’’

-1 ‘‘Less likely’’

0 ‘‘neither more nor less likely’’

1 ‘‘More likely’’

2 ‘‘certain or almost certain

1. A 7-year-old girl presents with frequent nosebleeds, worse on the left

| If you were thinking of | And then you find | This diagnosis becomes: |
| --- | --- | --- |
| 24.Hemophilia | History of nose picking | -2 -1 0 +1 +2 |
| 25.Foreign body nose | History of foul smelling discharge mixed with blood on the left side | -2 -1 0 +1 +2 |
| 26.Nasopharyngeal angiofibroma | History of left side nasal obstruction | -2 -1 0 +1 +2 |
| 27.Septal deviation | History of recurrent knee swelling | -2 -1 0 +1 +2 |

Judgement type: Diagnosis

-2 ‘‘Ruled out or almost ruled out’’

-1 ‘‘Less likely’’

0 ‘‘neither more nor less likely’’

1 ‘‘More likely’’

2 ‘‘certain or almost certain

1. A 30 year male presents with nasal obstruction

| If you were thinking of | And then you find | This diagnosis becomes: |
| --- | --- | --- |
| 28.Septal deviation | Decreased fogging on the left side | -2 -1 0 +1 +2 |
| 29.Antrochoanal polyp | Mass in the left side with bleeds on probing | -2 -1 0 +1 +2 |
| 30.Inverted papilloma | Roomy nasal cavity | -2 -1 0 +1 +2 |
| 31.rhinosporidiosis | leafy, polypoidal mass, pink to purple in color with surface studded with white spots | -2 -1 0 +1 +2 |

Judgement type: Diagnosis

-2 ‘‘Ruled out or almost ruled out’’

-1 ‘‘Less likely’’

0 ‘‘neither more nor less likely’’

1 ‘‘More likely’’

2 ‘‘certain or almost certain

1. A 50year old male present with epistaxis

| If you were thinking of | And then you find | This diagnosis becomes: |
| --- | --- | --- |
| 32.Cancer nasopharynx | Unilateral SOM | -2 -1 0 +1 +2 |
| 33.Nasopharyngeal angiofibroma | Mass in nasopharynx | -2 -1 0 +1 +2 |
| 34.Foreign body nose | Bilateral enlarged lymphnodes | -2 -1 0 +1 +2 |
| 35.Atrophic rhinitis | Bilateral nasal obstruction | -2 -1 0 +1 +2 |

Judgement type: Diagnosis

-2 ‘‘Ruled out or almost ruled out’’

-1 ‘‘Less likely’’

0 ‘‘neither more nor less likely’’

1 ‘‘More likely’’

2 ‘‘certain or almost certain

1. A 15 year male anosmia presents to you

| If you were thinking of | And then you find | This diagnosis becomes: |
| --- | --- | --- |
| 36.Ethmoidal polyp | Unilateral nasal obstruction | -2 -1 0 +1 +2 |
| 37.Deviated nasal septum | Inferior turbinate hypertrophy | -2 -1 0 +1 +2 |
| 38.Nasal bone fracture | Watery discharge when the patient leans forward | -2 -1 0 +1 +2 |
| 39.rhinoscleroma | Granulomatous lesion in the nose | -2 -1 0 +1 +2 |

Judgement type: Diagnosis

-2 ‘‘Ruled out or almost ruled out’’

-1 ‘‘Less likely’’

0 ‘‘neither more nor less likely’’

1 ‘‘More likely’’

2 ‘‘certain or almost certain

1. A 35 year female with nasal symptoms underwent Diagnostic nasal endoscopy

| If you were thinking of | And then you find | This diagnosis becomes: |
| --- | --- | --- |
| 40.Inverted papilloma | Friable bleeding mass in the nasal cavity | -2 -1 0 +1 +2 |
| 41.Nasal polyposis | Minimal polypoidal change in the left middle meatus | -2 -1 0 +1 +2 |
| 42.Chronic sinusitis | Mucopurulent discharge in sphenoethmoidal recess | -2 -1 0 +1 +2 |
| 43.Saddle nose | Spur on the left side septum | -2 -1 0 +1 +2 |

Judgement type: Diagnosis

-2 ‘‘Ruled out or almost ruled out’’

-1 ‘‘Less likely’’

0 ‘‘neither more nor less likely’’

1 ‘‘More likely’’

2 ‘‘certain or almost certain

1. A 8 year old male child with nasal discharge

| If you were thinking of | And then you find | This diagnosis becomes: |
| --- | --- | --- |
| 44.Adenoiditis | Bilateral retracted tympanic membrane with air fluid level | -2 -1 0 +1 +2 |
| 45.Antrochoanal polyp | Posterior rhinoscopy polyp visualized in choana | -2 -1 0 +1 +2 |
| 46.Rhinolith | History of foreign body removal | -2 -1 0 +1 +2 |
| 47.CSF rhinorrhoea | Purulent nasal discharge, Sneezing, nasal stuffiness | -2 -1 0 +1 +2 |

Judgement type: Diagnosis

-2 ‘‘Ruled out or almost ruled out’’

-1 ‘‘Less likely’’

0 ‘‘neither more nor less likely’’

1 ‘‘More likely’’

2 ‘‘certain or almost certain

1. A 60 year old male presenting with headache underwent x-ray PNS

| If you were thinking of | And then you find | This diagnosis becomes: |
| --- | --- | --- |
| 48.Frontal Mucocele | Presence of scalloping with haziness in frontal sinus | -2 -1 0 +1 +2 |
| 49.Chronic sinusitis | Bony septum deviated to right | -2 -1 0 +1 +2 |
| 50.Malignancy of nose and PNS | Haziness extending outside maxillary sinus | -2 -1 0 +1 +2 |
| 51.Deviated septum | Heterogeneity in the maxillary sinus | -2 -1 0 +1 +2 |
| 52.Actue sinusitis | Air fluid level in the maxillary sinus | -2 -1 0 +1 +2 |

Judgement type: Diagnosis

-2 ‘‘Ruled out or almost ruled out’’

-1 ‘‘Less likely’’

0 ‘‘neither more nor less likely’’

1 ‘‘More likely’’

2 ‘‘certain or almost certain

1. A 40 year old male with left ear discharge

| If you were thinking of | And then you find | This diagnosis becomes: |
| --- | --- | --- |
| 53.ASOM | facial nerve palsy | -2 -1 0 +1 +2 |
| 54.Otitis externa | History of throat pain | -2 -1 0 +1 +2 |
| 55.Ramsay hunt syndrome | painful vesicles in the ear | -2 -1 0 +1 +2 |
| 56.CSOM | History of ear discharge for 2 months | -2 -1 0 +1 +2 |
| 57.Malignant otitis externa | The patient is uncontrolled diabetic | -2 -1 0 +1 +2 |

Judgement type: Diagnosis

-2 ‘‘Ruled out or almost ruled out’’

-1 ‘‘Less likely’’

0 ‘‘neither more nor less likely’’

1 ‘‘More likely’’

2 ‘‘certain or almost certain

1. A 23 year old male with ear discharge

| If you were thinking of | And then you find | This diagnosis becomes: |
| --- | --- | --- |
| 58.ASOM | Watery discharge | -2 -1 0 +1 +2 |
| 59.Furuncle of EAC | Serous discharge | -2 -1 0 +1 +2 |
| 60.CSOM(TTD) | Scanty fowl smelling discharge | -2 -1 0 +1 +2 |
| 61.Glomus tumor | Blood stained discharge | -2 -1 0 +1 +2 |

Judgement type: Diagnosis

-2 ‘‘Ruled out or almost ruled out’’

-1 ‘‘Less likely’’

0 ‘‘neither more nor less likely’’

1 ‘‘More likely’’

2 ‘‘certain or almost certain

1. A 30 year female with hard of hearing

| If you were thinking of | And then you find | This diagnosis becomes: |
| --- | --- | --- |
| 62.otosclerosis | No family history and intact TM | -2 -1 0 +1 +2 |
| 63.CSOM | A perforated tympanic membrane | -2 -1 0 +1 +2 |
| 64.Menieres diseases | no tinnitus or vertigo | -2 -1 0 +1 +2 |
| 65.Otitis externa | Wax in the ear | -2 -1 0 +1 +2 |

Judgement type: Diagnosis

-2 ‘‘Ruled out or almost ruled out’’

-1 ‘‘Less likely’’

0 ‘‘neither more nor less likely’’

1 ‘‘More likely’’

2 ‘‘certain or almost certain

1. A 25 year old female presented to EMS with trauma to the midface

| If you were thinking of | And then you find | This investigation becomes: |
| --- | --- | --- |
| 66.x-ray nasal bone | External nasal frame work normal with Tenderness and crepitus over the dorsum of nose | -2 -1 0 +1 +2 |
| 67.x-ray PNS | Left eye enophthalmos and she is 3 month pregnant | -2 -1 0 +1 +2 |
| 68.beta2 transferrin | few drops or a stream of fluid gushes down when bending forward or straining | -2 -1 0 +1 +2 |

Judgement type: investigation

-2 ‘‘Completely or almost completely unnecessary’’

-1 ‘‘Less useful’’

0 ‘‘Neither more nor less useful’’

1 ‘‘More useful’’

2 ‘‘Completely or almost completely necessary”

1. A 20 year male patient presenting with hot potato voice and a oropharyngeal mass

| If you were thinking of doing | And then you find | This investiation becomes: |
| --- | --- | --- |
| 69.Biopsy | Unilateral tonsillar enlargement | -2 -1 0 +1 +2 |
| 70.Needle aspiration | Bulge in the posterior 1/3 of tongue | -2 -1 0 +1 +2 |
| 71.x- ray STN | Retropharyngeal bulge | -2 -1 0 +1 +2 |

Judgement type: investigation

-2 ‘‘Completely or almost completely unnecessary’’

-1 ‘‘Less useful’’

0 ‘‘Neither more nor less useful’’

1 ‘‘More useful’’

2 ‘‘Completely or almost completely necessary”

1. A 5 year child presented with history of respiratory distress.

| If you were thinking of doing | And then you find | This invesigation becomes: |
| --- | --- | --- |
| 72.Direct laryngoscopy | rapidly progressing history with high grade fever | -2 -1 0 +1 +2 |
| 73.x-ray chest | History suggesting aspiration | -2 -1 0 +1 +2 |
| 74.x-ray nasal bone | history of croupy cough | -2 -1 0 +1 +2 |

Judgement type: investigation

-2 ‘‘Completely or almost completely unnecessary’’

-1 ‘‘Less useful’’

0 ‘‘Neither more nor less useful’’

1 ‘‘More useful’’

2 ‘‘Completely or almost completely necessary”

1. A 19-month-old boy presents with a swinging fever and irritability. The parents report that the child has been pulling at his throat and ears, which they think indicates that the child is in pain.

| If you were thinking of | And then you find | This treatment becomes: |
| --- | --- | --- |
| 75.Incision and drainage | x- ray soft tissue neck lateral view Thumb sign | -2 -1 0 +1 +2 |
| 76.Steroids | x-ray STN showing steeple’s sign | -2 -1 0 +1 +2 |
| 77.Antibiotics | Membrane Over the Tonsil | -2 -1 0 +1 +2 |
| 78.Ampicillin | Paul bunnel test positive | -2 -1 0 +1 +2 |

Judgement type: treatment

-2 ‘‘Completely or almost completely unnecessary’’

-1 ‘‘Less useful’’

0 ‘‘Neither more nor less useful’’

1 ‘‘More useful’’

2 ‘‘Completely or almost completely necessary”

1. A 5 year child presented to EMS with history of Foreign body intake

| If you were thinking of doing | And then you find | This treatment becomes: |
| --- | --- | --- |
| 79.Bronchoscopy | Unilateral decrease in lung sound and x- ray shows hyperinflation on same side | -2 -1 0 +1 +2 |
| 80.Oesophagoscopy | Pooling of saliva in right piriform sinus on tele laryngoscopy | -2 -1 0 +1 +2 |

Judgement type: treatment

-2 ‘‘Completely or almost completely unnecessary’’

-1 ‘‘Less useful’’

0 ‘‘Neither more nor less useful’’

1 ‘‘More useful’’

2 ‘‘Completely or almost completely necessary”

1. A 50 year male presented with difficuilty in swallowing after the party session.

| If you were thinking of doing | And then you find | This treatment becomes: |
| --- | --- | --- |
| 81.Oesophagoscopy | History of choking with aphonia in the party itself in your presence | -2 -1 0 +1 +2 |
| 82.Heimleichs maneuver | x-ray radio opaque foreign body at the level of C4-C5 of prevertebral shadow | -2 -1 0 +1 +2 |

Judgement type: treatment

-2 ‘‘Completely or almost completely unnecessary’’

-1 ‘‘Less useful’’

0 ‘‘Neither more nor less useful’’

1 ‘‘More useful’’

2 ‘‘Completely or almost completely necessary”

1. A 45 year male with cancer larynx

| If you were thinking of doing | And then you find | This treatment becomes: |
| --- | --- | --- |
| 83.Tracheostomy | Noisy breathing | -2 -1 0 +1 +2 |
| 84.Total laryngectomy | Lung metastasis | -2 -1 0 +1 +2 |
| 85.Radiation | T1 larynx | -2 -1 0 +1 +2 |

Judgement type: treatment

-2 ‘‘Completely or almost completely unnecessary’’

-1 ‘‘Less useful’’

0 ‘‘Neither more nor less useful’’

1 ‘‘More useful’’

2 ‘‘Completely or almost completely necessary”

1. A 10 year with chronic tonsillitis presents to the OPD

| If you were thinking of doing | And then you find | This diagnosis becomes: |
| --- | --- | --- |
| 86.Managing conservatively | OSAS | -2 -1 0 +1 +2 |
| 87.Tonsillectomy | <5 episodes in 1 year | -2 -1 0 +1 +2 |
| 88.Tonsillectomy | Patient is a Diphtheria carrier | -2 -1 0 +1 +2 |
| 89.Adenotonsillectomy | No history snoring and impedence normal | -2 -1 0 +1 +2 |

Judgement type: treatment

-2 ‘‘Completely or almost completely unnecessary’’

-1 ‘‘Less useful’’

0 ‘‘Neither more nor less useful’’

1 ‘‘More useful’’

2 ‘‘Completely or almost completely necessary”

1. A 25 year old male with nasal obstruction and haziness of left maxillary sinus

| If you were thinking of | And then you find | This treatment becomes: |
| --- | --- | --- |
| 90.Proof puncture | Air fluid level in the maxillary sinus | -2 -1 0 +1 +2 |
| 91.biopsy | Septal bulge indicating hematoma | -2 -1 0 +1 +2 |
| 92.Cald well luc | Suspicion of malignancy in CT scan | -2 -1 0 +1 +2 |
| 93.polypectomy | Bilateral Pale polyps in DNE responding to nasal steroid | -2 -1 0 +1 +2 |
| 94.FESS | Purulent discharge in the middle meatus | -2 -1 0 +1 +2 |

Judgement type: treatment

-2 ‘‘Completely or almost completely unnecessary’’

-1 ‘‘Less useful’’

0 ‘‘Neither more nor less useful’’

1 ‘‘More useful’’

2 ‘‘Completely or almost completely necessary”

1. A 30 year male with chronic sinusitis is due for treatment

| If you were thinking of | And then you find | This treatment becomes: |
| --- | --- | --- |
| 95.antibiotic | Polyp in the middle meatus extending to the choana | -2 -1 0 +1 +2 |
| 96.Nasal steroid spray | Purulent discharge in the middle meatus | -2 -1 0 +1 +2 |
| 97.antihistamine | No feature of allergic rhinitis | -2 -1 0 +1 +2 |
| 98.Oral steroid | Is diabetic | -2 -1 0 +1 +2 |

Judgement type: treatment

-2 ‘‘Completely or almost completely unnecessary’’

-1 ‘‘Less useful’’

0 ‘‘Neither more nor less useful’’

1 ‘‘More useful’’

2 ‘‘Completely or almost completely necessary”
