# Supplementary material for: Consensus Analysis for the Panel Responses and the Psychometrics Properties in Script Concordance Testing
Source: Research Square preprint supplement (doi:10.21203/rs.3.rs-133349/v1), 2021-01-07
Supplement: Supplementary file 2 [file 205eb7eaf477136b4f8b6f44.docx]

***Table 6****. Scores of Panel members, UG and PG students*

|  | **Panel** | **UGs** | **PGs** |
| --- | --- | --- | --- |
| **N** | 20 | 30 | 10 |
| **Items tested** | 98 | 82 | 82 |
| **Mean Score** | 79.5 | 61.1* | 67.7* |
| **SD** | 4.4 | 7.5 | 6.3 |
| **Median** | 79.4 | 61.0 | 68.6 |
| **Min** | 72.6 | 43.2 | 54.5 |
| **Max** | 87.5 | 77.0 | 75.4 |

*p-value between UGs & PGs = 0.039 (statistically significant using Independent Samples t-test)
