# Supplementary material for: Consensus Analysis for the Panel Responses and the Psychometrics Properties in Script Concordance Testing
Source: Research Square preprint supplement (doi:10.21203/rs.3.rs-133349/v1), 2021-01-07
Supplement: Supplementary file 2 [file ff0a249b5c60c3b0893f624d.docx]

| ***Q. A 7-year-old girl presents with frequent nosebleeds, worse on the left,***   | Item No. | If you were thinking of | And then you find | Response | | | | | | --- | --- | --- | --- | --- | --- | --- | --- | | -2 | -1 | 0 | +1 | +2 | | 45 | Hemophilia | History of nose picking | 0 | 0 | 0 | 5 | 15 | | 46 | Foreign body nose | History of foul-smelling discharge mixed with blood on the left side | 0 | 3 | 1 | 14 | 2 | | 47 | Nasopharyngeal angiofibroma | History of left side nasal obstruction | 17 | 3 | 0 | 0 | 0 | | 48 | Septal deviation | History of recurrent knee swelling | 10 | 3 | 1 | 3 | 3 |   -2 “Ruled out or almost ruled out.”  -1 “Less likely.”  0 “Neither more nor less likely.”  +1 “More likely.”  +2 “Certain or almost certain.” |
| --- | --- | --- | --- | --- | --- | --- | --- | --- | --- | --- | --- | --- | --- | --- | --- | --- | --- | --- | --- | --- | --- | --- | --- | --- | --- | --- | --- | --- | --- | --- | --- | --- | --- | --- | --- | --- | --- | --- | --- | --- | --- | --- | --- | --- | --- |
