# Supplementary material for: Consensus Analysis for the Panel Responses and the Psychometrics Properties in Script Concordance Testing
Source: Research Square preprint supplement (doi:10.21203/rs.3.rs-133349/v1), 2021-01-07
Supplement: Supplementary file 3 [file 944f064202a366c2ffa03c7d.docx]

| **Consensus Index** | **No. of eligible items** | **Cronbach’s alpha with N similar items** |
| --- | --- | --- |
| >58.64* | 82 | 0.74 |
| >60 | 81 | 0.74 |
| >70 | 59 | 0.76 |
| >80 | 28 | 0.96 |

**58.65 was the minimum consensus index of 82-item SCT administered to the students*

***Table 7.*** *Table showing the relation of the consensus index and the Cronbach’s alpha with the respective number of items of the SCT*
