# Supplementary material for: Consensus Analysis for the Panel Responses and the Psychometrics Properties in Script Concordance Testing
Source: Research Square preprint supplement (doi:10.21203/rs.3.rs-133349/v1), 2021-01-07
Supplement: Supplementary file 4 [file b6ae1928884eebfa5497902e.docx]

| **S. No.** | **Panel Response Pattern** | **No. of responses (n=98)** | **Consensus Index (Range)** |
| --- | --- | --- | --- |
| 1 | Ideal responses | 37 | 67.82-100 |
| 2 | Partial ideal responses | 37 | 58.65 – 85.22 |
| 3 | Discrete Outlier responses | 8 | 60.67 – 73.7 |
| 4 | Uniform responses | 14 | 32.28 – 61.37 |
| 5 | Bimodal responses | 2 | 25.81 – 58.95 |
