# Supplementary material for: Consensus Analysis for the Panel Responses and the Psychometrics Properties in Script Concordance Testing
Source: Research Square preprint supplement (doi:10.21203/rs.3.rs-133349/v1), 2021-01-07
Supplement: Supplementary file 5 [file e8d3bb5bb0c69d00eb127317.docx]

|  | **-2** | **-1** | **0** | **+1** | **+2** |  |
| --- | --- | --- | --- | --- | --- | --- |
| No. of panel member who selected the response for Item no.46 | 0 | 3 | 1 | 14 | 2 | Step I: Identify the answer chosen by most panel members (+1) |
| The mechanism for the creation of scores | 0/14 | 3/14 | 1/14 | 14/ 14 | 2/14 | Step II: Dividing by the number of members who selected the modal response (n=14) |
| Credit score for item no.46 | 0 | 0.21 | 0.07 | 1 | 0.14 | Step III: Credit score to be awarded to the student choosing the response |
