# Supplementary material for: Consensus Analysis for the Panel Responses and the Psychometrics Properties in Script Concordance Testing
Source: Research Square preprint supplement (doi:10.21203/rs.3.rs-133349/v1), 2021-01-07
Supplement: Supplementary file 6 [file ea5435a3838d52318da2c66d.docx]

***Table 5****. Responses of the panel, response pattern, and consensus index of each item*

| Item No | -2 | -1 | 0 | 1 | 2 | Pattern | Consensus  Index |  |  | Item No | -2 | -1 | 0 | 1 | 2 | Pattern | Consensus  Index |
| --- | --- | --- | --- | --- | --- | --- | --- | --- | --- | --- | --- | --- | --- | --- | --- | --- | --- |
| 74 | 20 | 0 | 0 | 0 | 0 | I | 100 |  |  | 12 | 3 | 9 | 7 | 1 | 0 | PI | 72.72 |
| 75 | 19 | 1 | 0 | 0 | 0 | I | 96.32 |  |  | 54 | 9 | 7 | 4 | 0 | 0 | I | 72.45 |
| 79 | 0 | 0 | 0 | 1 | 19 | I | 96.32 |  |  | 18 | 2 | 6 | 10 | 2 | 0 | PI | 71.78 |
| 32 | 0 | 0 | 1 | 17 | 2 | I | 92.35 |  |  | 96 | 4 | 12 | 1 | 3 | 0 | PI | 71.75 |
| 30 | 17 | 3 | 0 | 0 | 0 | I | 90.14 |  |  | 16 | 0 | 6 | 8 | 5 | 1 | PI | 71.49 |
| 47 | 17 | 3 | 0 | 0 | 0 | I | 90.14 |  |  | 60 | 7 | 11 | 1 | 0 | 1 | O | 71.29 |
| 91 | 17 | 3 | 0 | 0 | 0 | I | 90.14 |  |  | 37 | 0 | 3 | 5 | 11 | 1 | PI | 71.03 |
| 98 | 17 | 3 | 0 | 0 | 0 | I | 90.14 |  |  | 29 | 4 | 10 | 4 | 2 | 0 | PI | 70.94 |
| 80 | 0 | 0 | 0 | 3 | 17 | I | 90.14 |  |  | 19 | 1 | 0 | 0 | 11 | 8 | O | 70.82 |
| 85 | 0 | 0 | 0 | 3 | 17 | I | 90.14 |  |  | 62 | 1 | 2 | 7 | 10 | 0 | PI | 70.34 |
| 73 | 0 | 0 | 0 | 4 | 16 | I | 87.64 |  |  | 21 | 0 | 2 | 6 | 9 | 3 | PI | 69.80 |
| 07 | 0 | 0 | 4 | 15 | 1 | I | 86.53 |  |  | 26 | 14 | 3 | 2 | 1 | 0 | PI | 69.77 |
| 31 | 0 | 0 | 1 | 2 | 17 | I | 86.18 |  |  | 10 | 0 | 4 | 2 | 13 | 1 | PI | 69.28 |
| 34 | 17 | 2 | 1 | 0 | 0 | I | 86.18 |  |  | 40 | 0 | 6 | 5 | 9 | 0 | I | 68.44 |
| 45 | 0 | 0 | 0 | 5 | 15 | I | 85.53 |  |  | 35 | 3 | 1 | 9 | 7 | 0 | PI | 68.40 |
| 52 | 0 | 0 | 0 | 5 | 15 | I | 85.53 |  |  | 24 | 4 | 5 | 10 | 1 | 0 | PI | 68.36 |
| 83 | 0 | 0 | 0 | 5 | 15 | I | 85.53 |  |  | 89 | 12 | 3 | 5 | 0 | 0 | I | 67.82 |
| 61 | 0 | 1 | 2 | 16 | 1 | PI | 85.22 |  |  | 14 | 1 | 0 | 1 | 9 | 9 | O | 67.55 |
| 28 | 0 | 0 | 4 | 13 | 3 | I | 84.41 |  |  | 25 | 0 | 2 | 1 | 1 | 16 | PI | 66.98 |
| 68 | 0 | 1 | 0 | 1 | 18 | PI | 83.05 |  |  | 88 | 1 | 0 | 0 | 7 | 12 | O | 66.86 |
| 77 | 0 | 0 | 1 | 4 | 15 | I | 82.02 |  |  | 49 | 2 | 3 | 7 | 8 | 0 | PI | 66.76 |
| 50 | 0 | 0 | 3 | 12 | 5 | I | 81.66 |  |  | 95 | 8 | 8 | 3 | 0 | 1 | O | 66.11 |
| 04 | 12 | 8 | 0 | 0 | 0 | I | 81.50 |  |  | 97 | 9 | 8 | 0 | 3 | 0 | PI | 65.60 |
| 63 | 0 | 0 | 0 | 9 | 11 | I | 80.93 |  |  | 09 | 1 | 8 | 5 | 6 | 0 | PI | 65.52 |
| 64 | 9 | 11 | 0 | 0 | 0 | I | 80.93 |  |  | 02 | 5 | 8 | 4 | 3 | 0 | PI | 64.32 |
| 01 | 0 | 0 | 0 | 10 | 10 | I | 80.74 |  |  | 15 | 1 | 9 | 4 | 6 | 0 | PI | 64.29 |
| 42 | 0 | 0 | 1 | 12 | 7 | I | 80.70 |  |  | 11 | 1 | 8 | 4 | 7 | 0 | PI | 63.52 |
| 84 | 14 | 5 | 1 | 0 | 0 | I | 80.52 |  |  | 38 | 1 | 2 | 4 | 10 | 3 | PI | 63.45 |
| 08 | 0 | 0 | 1 | 11 | 8 | I | 79.53 |  |  | 76 | 1 | 1 | 0 | 8 | 10 | O | 63.26 |
| 55 | 0 | 0 | 1 | 6 | 13 | I | 79.40 |  |  | 78 | 15 | 1 | 2 | 2 | 0 | PI | 62.96 |
| 44 | 0 | 0 | 1 | 10 | 9 | I | 78.74 |  |  | 17 | 0 | 7 | 3 | 9 | 1 | PI | 62.08 |
| 57 | 0 | 0 | 1 | 10 | 9 | I | 78.74 |  |  | 66 | 1 | 1 | 1 | 7 | 10 | U | 61.37 |
| 53 | 0 | 4 | 11 | 3 | 1 | PI | 78.40 |  |  | 72 | 13 | 5 | 0 | 1 | 1 | O | 60.67 |
| 71 | 0 | 1 | 0 | 4 | 15 | PI | 77.14 |  |  | 13 | 1 | 6 | 3 | 9 | 1 | B | 58.95 |
| 03 | 0 | 0 | 2 | 9 | 9 | I | 76.60 |  |  | 65 | 5 | 2 | 10 | 2 | 1 | U | 58.81 |
| 27 | 10 | 8 | 2 | 0 | 0 | I | 75.98 |  |  | 41 | 2 | 3 | 6 | 7 | 2 | PI | 58.65 |
| 39 | 0 | 2 | 2 | 12 | 4 | PI | 75.56 |  |  | 59 | 2 | 6 | 4 | 7 | 1 | U | 57.70 |
| 36 | 5 | 10 | 4 | 1 | 0 | PI | 75.46 |  |  | 86 | 7 | 8 | 1 | 3 | 1 | U | 56.53 |
| 43 | 6 | 8 | 6 | 0 | 0 | I | 75.10 |  |  | 82 | 10 | 5 | 2 | 2 | 1 | U | 54.86 |
| 05 | 13 | 6 | 0 | 1 | 0 | PI | 75.09 |  |  | 58 | 9 | 5 | 3 | 2 | 1 | U | 54.62 |
| 46 | 0 | 3 | 1 | 14 | 2 | PI | 74.13 |  |  | 56 | 3 | 1 | 3 | 10 | 3 | U | 52.38 |
| 23 | 1 | 0 | 1 | 12 | 6 | O | 73.70 |  |  | 93 | 3 | 8 | 3 | 4 | 2 | U | 51.55 |
| 87 | 1 | 9 | 8 | 2 | 0 | PI | 73.48 |  |  | 90 | 1 | 5 | 4 | 5 | 5 | U | 50.53 |
| 06 | 0 | 1 | 1 | 9 | 9 | PI | 73.44 |  |  | 70 | 3 | 7 | 4 | 3 | 3 | U | 49.32 |
| 20 | 0 | 1 | 1 | 9 | 9 | PI | 73.44 |  |  | 92 | 12 | 3 | 1 | 3 | 1 | U | 48.20 |
| 94 | 0 | 1 | 1 | 9 | 9 | PI | 73.44 |  |  | 67 | 9 | 3 | 3 | 4 | 1 | U | 44.79 |
| 22 | 0 | 3 | 5 | 12 | 0 | I | 73.15 |  |  | 81 | 10 | 4 | 1 | 2 | 3 | U | 36.50 |
| 51 | 2 | 3 | 11 | 4 | 0 | PI | 73.06 |  |  | 48 | 10 | 3 | 1 | 3 | 3 | U | 32.28 |
| 33 | 0 | 14 | 4 | 1 | 1 | PI | 72.82 |  |  | 69 | 5 | 2 | 1 | 4 | 8 | B | 25.81 |

Legend: I - Ideal response, PI – Partial ideal response, O – Discrete outlier, U - Uniform response, B – Bimodal response
